# Supplementary material for: Self-doping for visible light photocatalytic purposes: construction of SiO2/SnO2/SnO2:Sn2+nanostructures with tunable optical and photocatalytic performance
Source: Royal Society of Chemistry journal article supplement (doi:10.1039/c4ra04356a), 2014-07-17
Supplement: c4ra04356a1.pdf [file c4ra04356a1.pdf]

Supporting Information for

Self-doping for visible light photocatalytic purposes: construction of  
 $\text{SiO}_2/\text{SnO}_2/\text{SnO}_2:\text{Sn}^{2+}$  nanostructures with tunable optical and  
photocatalytic performance

Menglin Sun, Yiguo Su, Chunfang Du\*, Qihang Zhao, Zhiliang Liu\*

*College of Chemistry and Chemical Engineering, Inner Mongolia University, Hohhot, Inner Mongolia*

*010021, P. R. China*

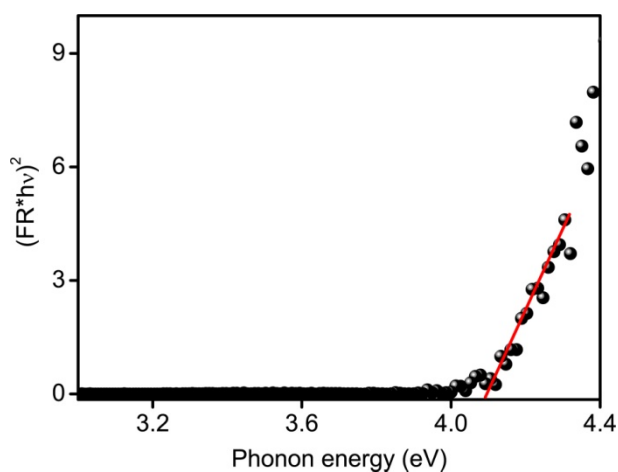

Figure S1 Relationships between  $(\alpha hv)^2$  and photon energy of  $\text{SiO}_2/\text{SnO}_2$ .

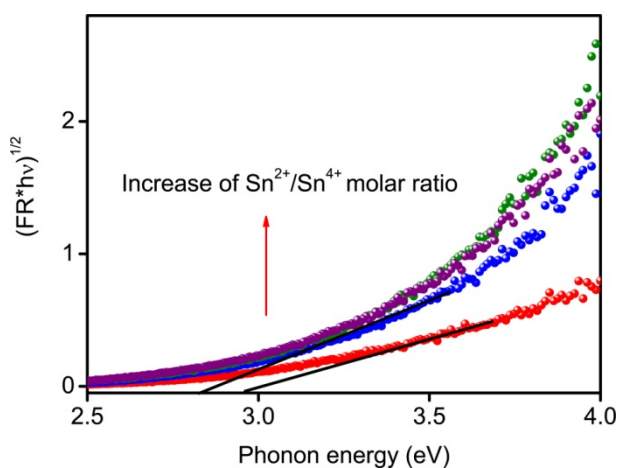

Figure S2 Relationships between  $(\alpha hv)^{1/2}$  and photon energy of  $\text{SiO}_2/\text{SnO}_2/\text{SnO}_2:\text{Sn}^{2+}$  nanostructures with different  $\text{Sn}^{2+}/\text{Sn}^{4+}$  molar ratio.

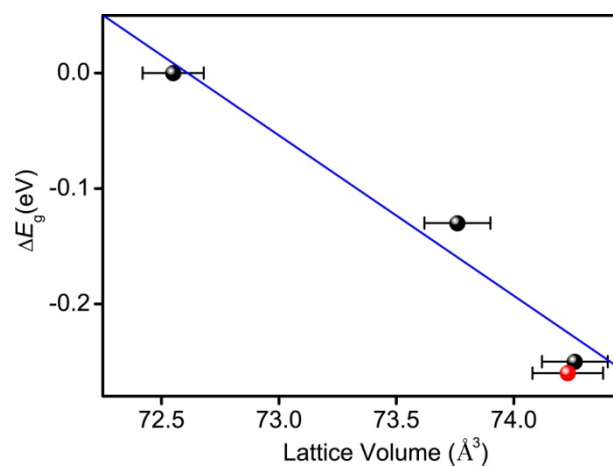

Figure S3 Correlation between the band gap energies and the lattice volume of SiO<sub>2</sub>/SnO<sub>2</sub>/SnO<sub>2</sub>:Sn<sup>2+</sup> nanostructures.

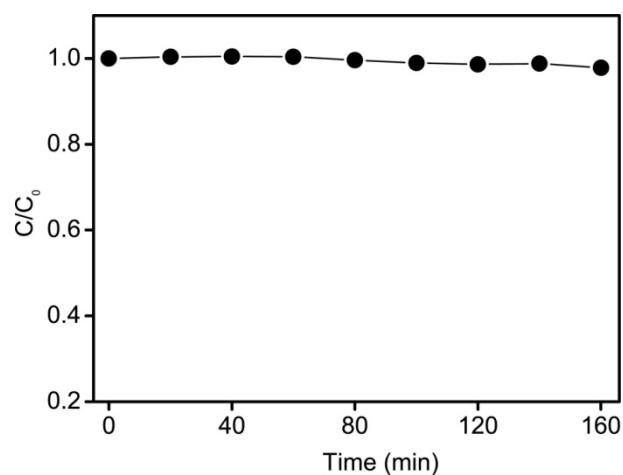

Figure S4 Normalized concentration of methyl orange versus visible light irradiation time in the absence of SiO<sub>2</sub>/SnO<sub>2</sub>/SnO<sub>2</sub>:Sn<sup>2+</sup>.

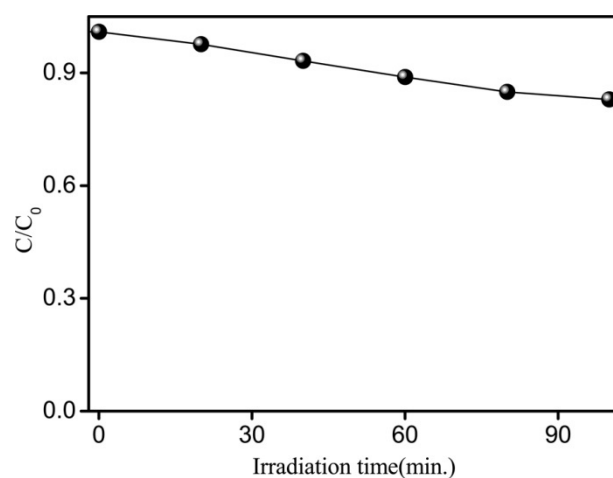

Figure S5 Normalized concentration of methyl orange versus visible light irradiation

time in the absence of  $\text{SiO}_2$ .

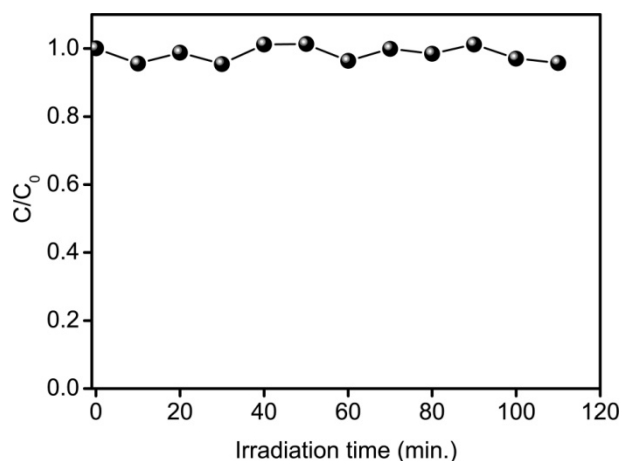

Figure S6 Normalized concentration of methyl orange versus visible light irradiation time in the absence of  $\text{SnO}_2:\text{Sn}^{2+}$  nanocrystals.

$\text{SnO}_2:\text{Sn}^{2+}$  nanocrystals were prepared via a facile hydrothermal method. Briefly, 0.228 g  $\text{SnCl}_2$  was dissolved in 20 mL ethanol with vigorous stirring to form a suspension. This suspension was sealed in 100 mL Teflon-lined stainless steel autoclaves and reacted at 180 °C for 18 hours. The final product was washed with distilled water several times and dried at 60 °C for 3 hours.
